# Supplementary material for: Polymorphisms of TGFBR1, TLR4 are associated with prognosis of gastric cancer in a Chinese population
Source: Springer Nature journal article supplement (doi:10.1186/s12935-018-0682-0), 2018-11-20
Supplement: MOESM2 [file 16284032]

Additional file 2 Figure S1.

eQTL analysis of mRNA expression in whole blood and genotype data. A: *TLR4* rs1927911, p-value=0.000016; B: *TGF-BRI* rs6478974, p-value=6.5e-7, and C: rs334348, p-value= 0.0000029.

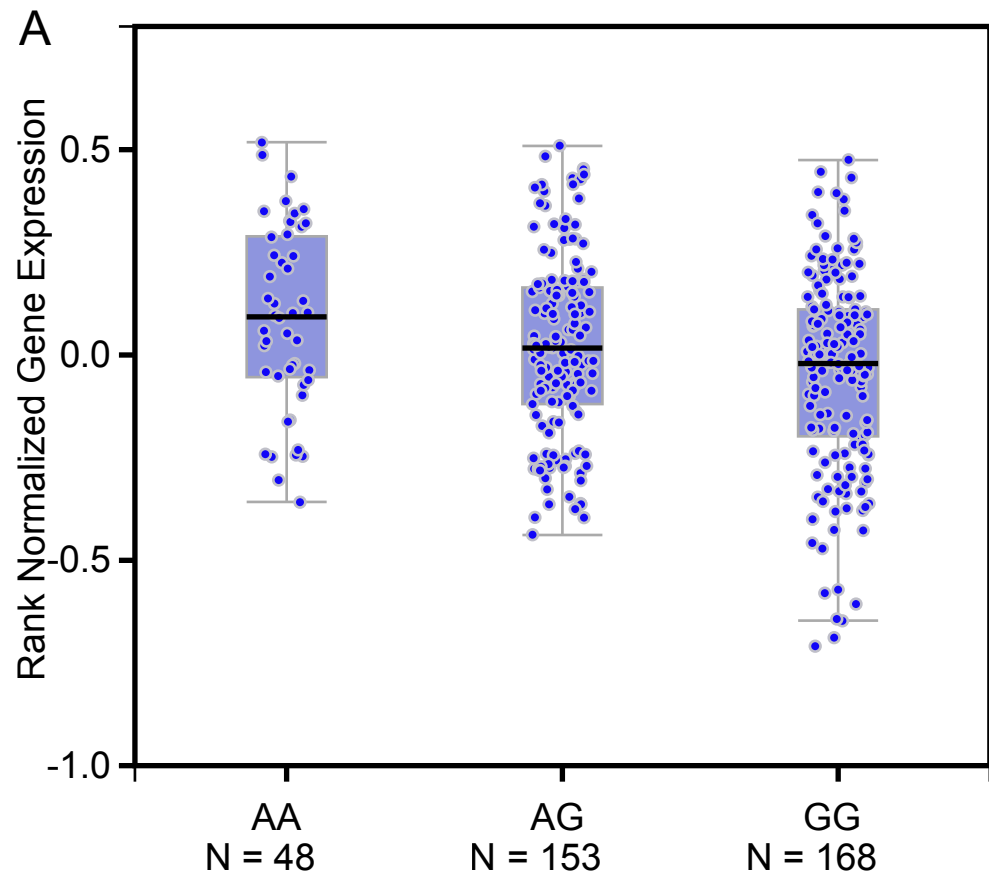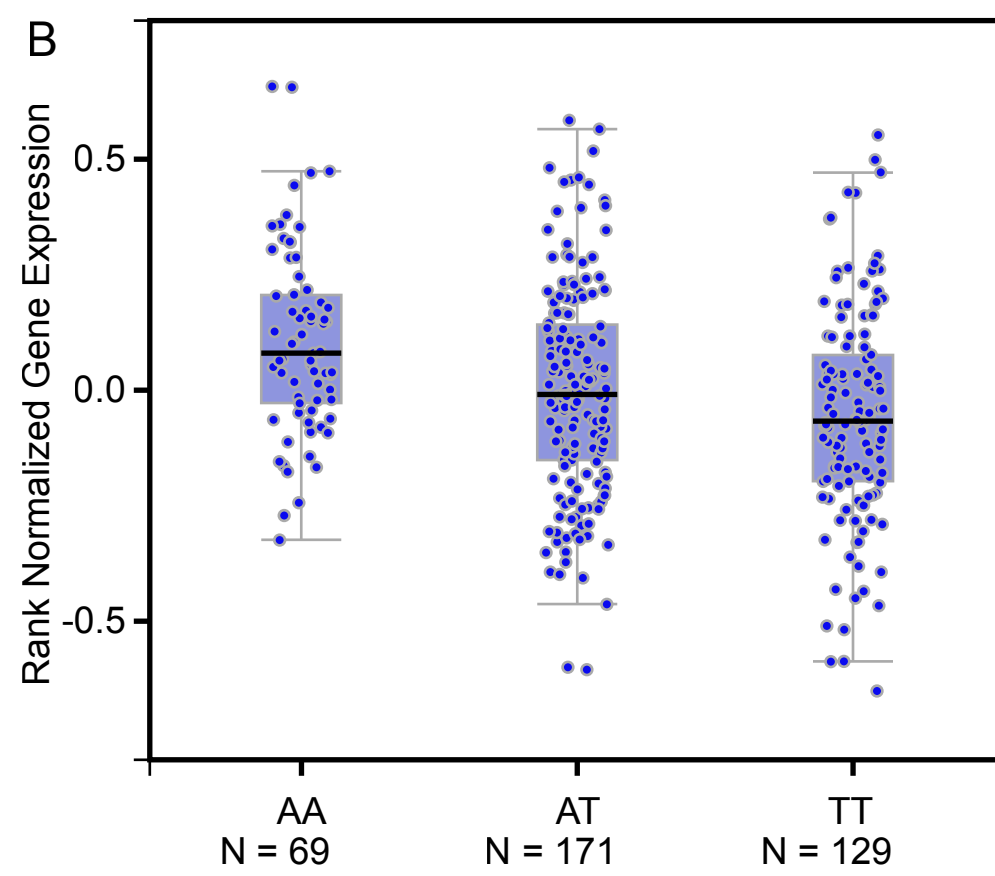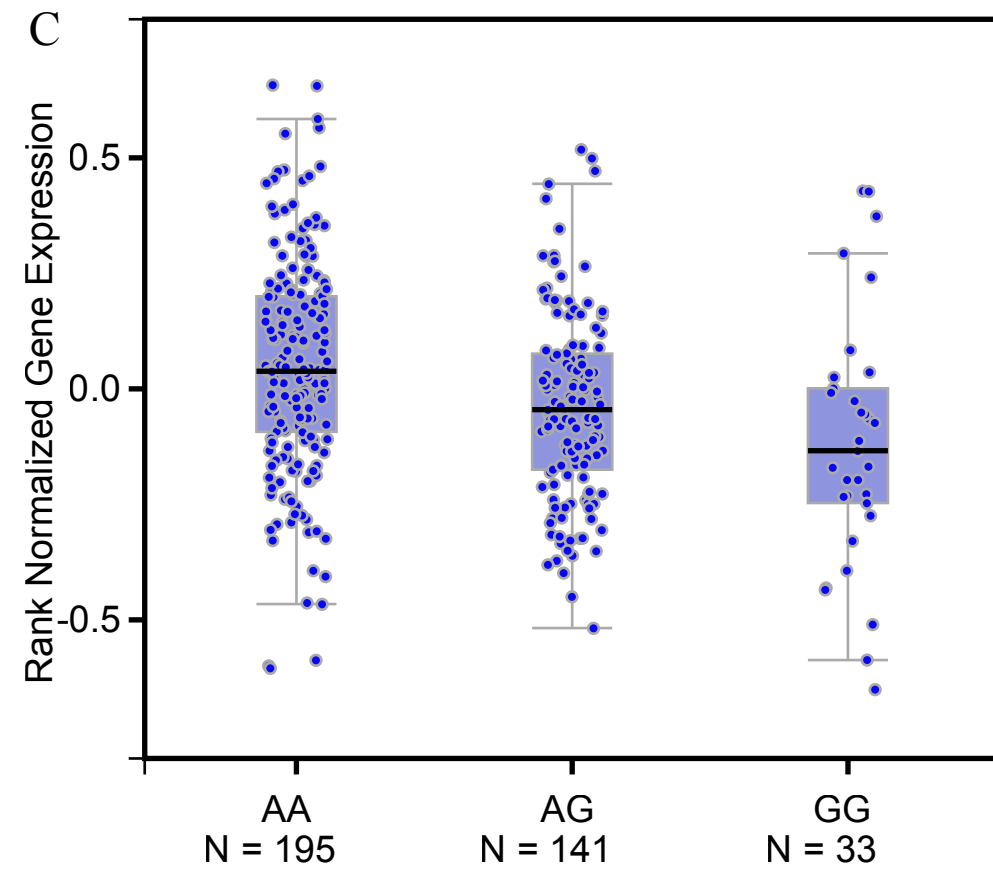

Additional file 2 Figure S2. Results from the Haploreg website for the *TGF-BRI* rs10512263

Query SNP: **rs10512263** and variants with  $r^2 \geq 0.8$

| chr | pos (hg38) | LD (r <sup>2</sup> ) | LD (D') | variant           | Ref | Alt | AFR freq | AMR freq | ASN freq | EUR freq | SiPhy cons | Promoter histone marks | Enhancer histone marks | DNAse | Proteins bound | Motifs changed   | NHGRI/EBI GWAS hits | GRASP QTL hits | Selected eQTL hits | GENCODE genes | dbSNP func annot |
|-----|------------|----------------------|---------|-------------------|-----|-----|----------|----------|----------|----------|------------|------------------------|------------------------|-------|----------------|------------------|---------------------|----------------|--------------------|---------------|------------------|
| 9   | 99123789   | 1                    | 1       | <b>rs10512263</b> | T   | C   | 0.02     | 0.11     | 0.26     | 0.07     |            |                        |                        | BLD   |                | <b>Ik-1,STAT</b> |                     |                |                    | TGFBR1        | intronic         |

## Regulatory motifs altered

| Position Weight Matrix ID<br>(Library from <a href="#">Kheradpour and Kellis, 2013</a> ) | Strand | Ref  | Alt | Match on:                                                                                                                           |
|------------------------------------------------------------------------------------------|--------|------|-----|-------------------------------------------------------------------------------------------------------------------------------------|
| Ik-1_2                                                                                   | +      | 12.9 | 9.8 | Ref: ATTCTACAGTGGAAATTTGTCACTACTTTTGGGAAGAAGTTTACCTTTGGTGGCCTACG<br>Alt: ATTCTACAGTGGAAATTTGTCACTACTTTGGGAAGAAGTTTACCTTTGGTGGCCTACG |
| STAT_known10                                                                             | -      | -5.5 | 6.4 | KYTRGGRRR<br>BDBVAHTCCSGGAADTRRSR                                                                                                   |
